# Supplementary material for: Nanograss-Assembled NiCo2S4 as an Efficient Platinum-Free Counter Electrode for Dye-Sensitized Solar Cell
Source: MDPI journal article supplement (doi:10.3390/nano13212896), 2023-11-02
Supplement: s1 [file s1]

## Nanograss-Assembled $\text{NiCo}_2\text{S}_4$ as An Efficient Platinum-Free Counter Electrode for Dye-Sensitized Solar Cell

Shada A. Alsharif

University College of Umlij, University of Tabuk, Tabuk 71491, Saudi Arabia; shalsharif@ut.edu.sa;

Tel.: +966-54-334-3381

The cyclic voltammetry (CV) was used to evaluate the NCS-1 counter electrode over 20 cycles

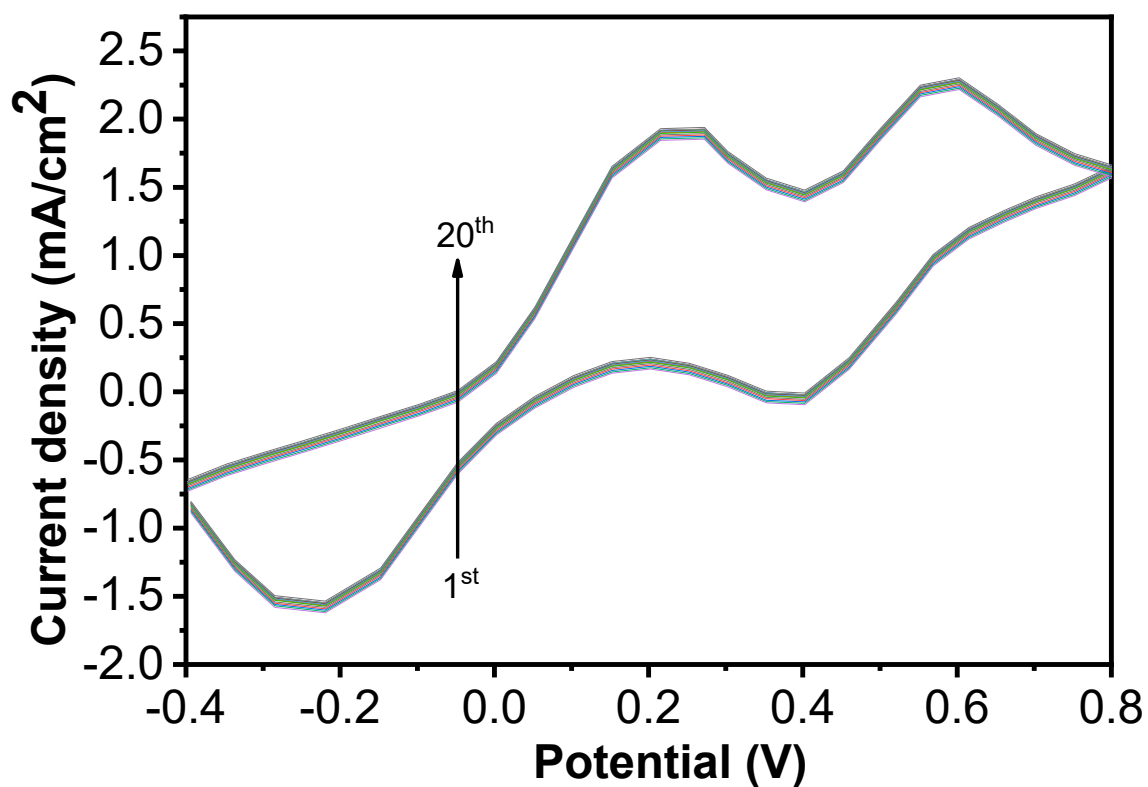

**Figure S1.** The cyclic voltammetry (CV) was used to evaluate the NCS-1 counter electrode over 20 cycles.

**Table S1:** Comparative Analysis of DSSC Electrode Materials: NCS vs. Alternatives

| Electrode materials                   | V <sub>oc</sub> (V) | PCE (%) | References   |
|---------------------------------------|---------------------|---------|--------------|
| NiCo <sub>2</sub> S <sub>4</sub>      | 0.830               | 6.51    | S1           |
| NiCo <sub>2</sub> S <sub>4</sub>      | 0.755               | 4.73    | S2           |
| NiCo <sub>2</sub> S <sub>4</sub> /RGO | 0.742               | 6.0     | S2           |
| NiCo <sub>2</sub> S <sub>4</sub>      | 0.76                | 5.81    | S3           |
| CoNi <sub>2</sub> S <sub>4</sub>      | 0.75                | 4.61    | S4           |
| CuInS <sub>2</sub>                    | 0.78                | 5.79    | S5           |
| NiCo <sub>2</sub> S <sub>4</sub>      | 0.55                | 4.22    | S6           |
| NiCo <sub>2</sub> S <sub>4</sub>      | 0.69                | 5.24    | S7           |
| NiCo <sub>2</sub> S <sub>4</sub>      | 0.75                | 6.60    | Present work |

## References

- S1. Ling Li, Xue Zhang, Shuang'an Liu, Baolai Liang, Yucang Zhang, Wenming Zhang, One-step hydrothermal synthesis of NiCo<sub>2</sub>S<sub>4</sub> loaded on electrospun carbon nanofibers as an efficient counter electrode for dye-sensitized solar cells, *Solar Energy*, Volume 202, 2020, Pages 358-364,
- S2. Hui Nan, Jianhua Han, Qiang Luo, Xuewen Yin, Yu Zhou, Zhibo Yao, Xiaochong Zhao, Xin Li, Hong Lin, Economically synthesized NiCo<sub>2</sub>S<sub>4</sub>/reduced graphene oxide composite as efficient counter electrode in dye-sensitized solar cell, *Applied Surface Science*, Volume 437, 2018, Pages 227-232.

- S3. Kangle Liu, Aixiang Wei, Jun Liu, Zhen Liu, Zhiming Xiao, Yu Zhao, NiCo<sub>2</sub>S<sub>4</sub> nanosheet thin film counter electrodes prepared by a two-step approach for dye-sensitized solar cells, *Materials Letters*, Volume 217, 2018, Pages 185-188.
- S4. Shi, Z.; Deng, K.; Li, L. Pt-free and efficient counter electrode with nanostructured CoNi<sub>2</sub>S<sub>4</sub> for dye-sensitized solar cells. *Sci. Rep.* 2015, 2-7.
- S5. Wang, L.; He, J.; Zhou, M.; Zhao, S.; Wang, Q.; Ding, B. Copper indium disulphide nanocrystals supported on carbonized chicken eggshell membranes as efficient counter electrodes for dye-sensitized solar cells. *J. Power Sources* 2016, 315, 79–85.
- S6. Junwu Xiao, Xianwei Zeng, Wei Chen, Fei Xiao, and Shuai Wang, High electrocatalytic activity of self-standing hollow NiCo<sub>2</sub>S<sub>4</sub> single crystalline nanorod arrays towards sulfide redox shuttles in quantum dot-sensitized solar cells, *Chem. Commun.*, 2013,49, 11734-11736. DOI: 10.1039/c3cc44242j.
- S7. Chenle Zhang, Libo Deng, Peixin Zhang, Xiangzhong Ren, Yongliang Li & Tingshu He, Electrospun NiCo<sub>2</sub>S<sub>4</sub> with extraordinary electrocatalytic activity as counter electrodes for dye-sensitized solar cells. *J Solid State Electrochem* 21, 3579–3588 (2017).
